# Supplementary figures and images for: Comparing Intraperitoneal and Intravenous Personalized ErbB2CAR-T for the Treatment of Epithelial Ovarian Cancer
Source: MDPI journal article supplement (doi:10.3390/biomedicines10092216), 2022-09-07

Supp Figure S1

supplementary

A.

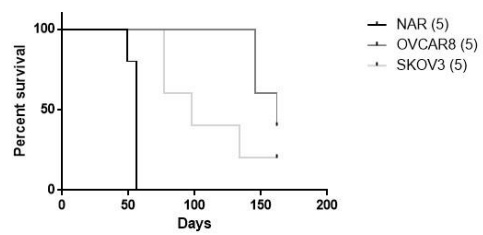

Supplement: s1 [file s1]
